# Supplementary material
Source: publisher site journal article supplement (https://www.spandidos-publications.com/2998/downloadSupplementary)

Figure S1. Flow cytometry analysis of cell cycle distribution. Cells were transfected with si-NC, si-LINC00460, si-LINC00460+miR-NC inhibitor or si-LINC00460+miR-320b inhibitor for 24 h, the cell cycle distribution was analyzed via flow cytometry. NC, negative control; miR, microRNA; LINC00460, long non-coding RNA 00460; siRNA, small interfering RNA

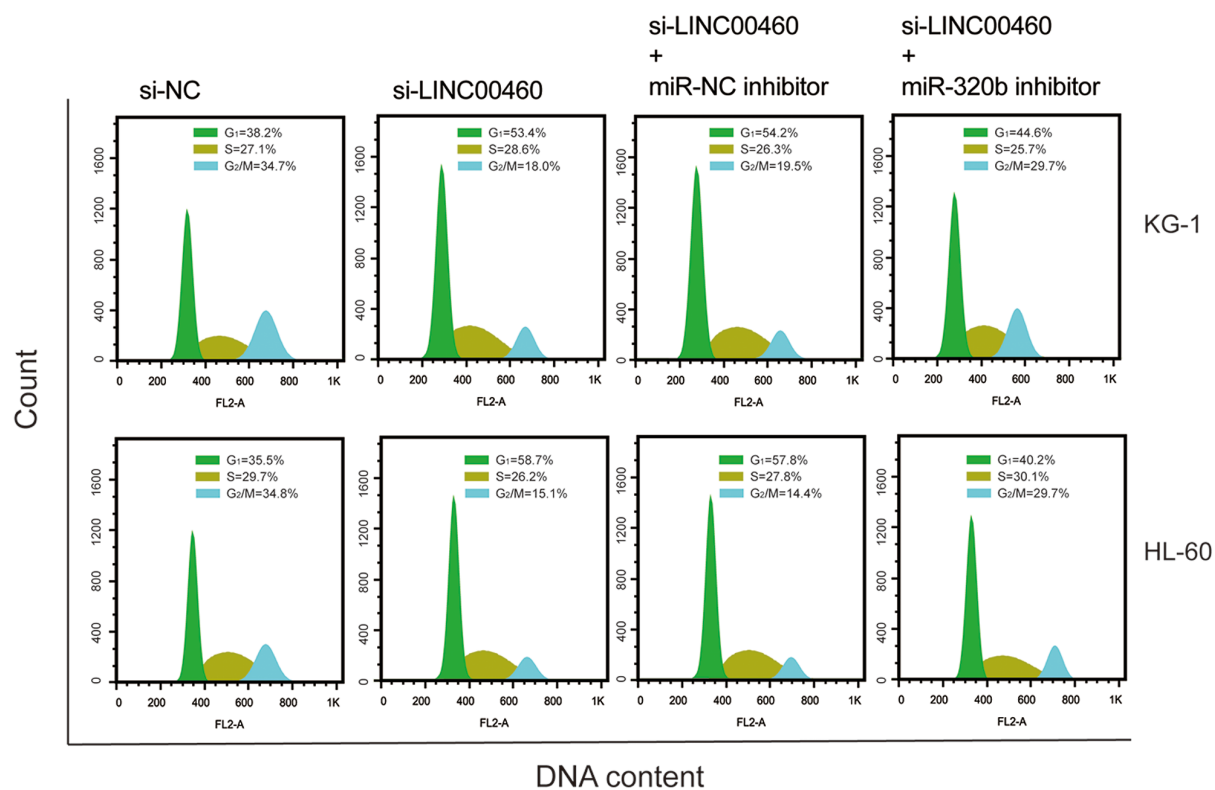

Figure S2. Flow cytometry analysis of cell cycle distribution. Cells were transfected with si-NC, si-LINC00460, si-LINC00460+pcDNA3.1 or si-LINC00460+pcDNA.PBX3 for 24 h, the cell cycle distribution was analyzed via flow cytometry. NC, negative control; LINC00460, long non-coding RNA 00460; siRNA, small interfering RNA; PBX3, PBX homeobox 3.

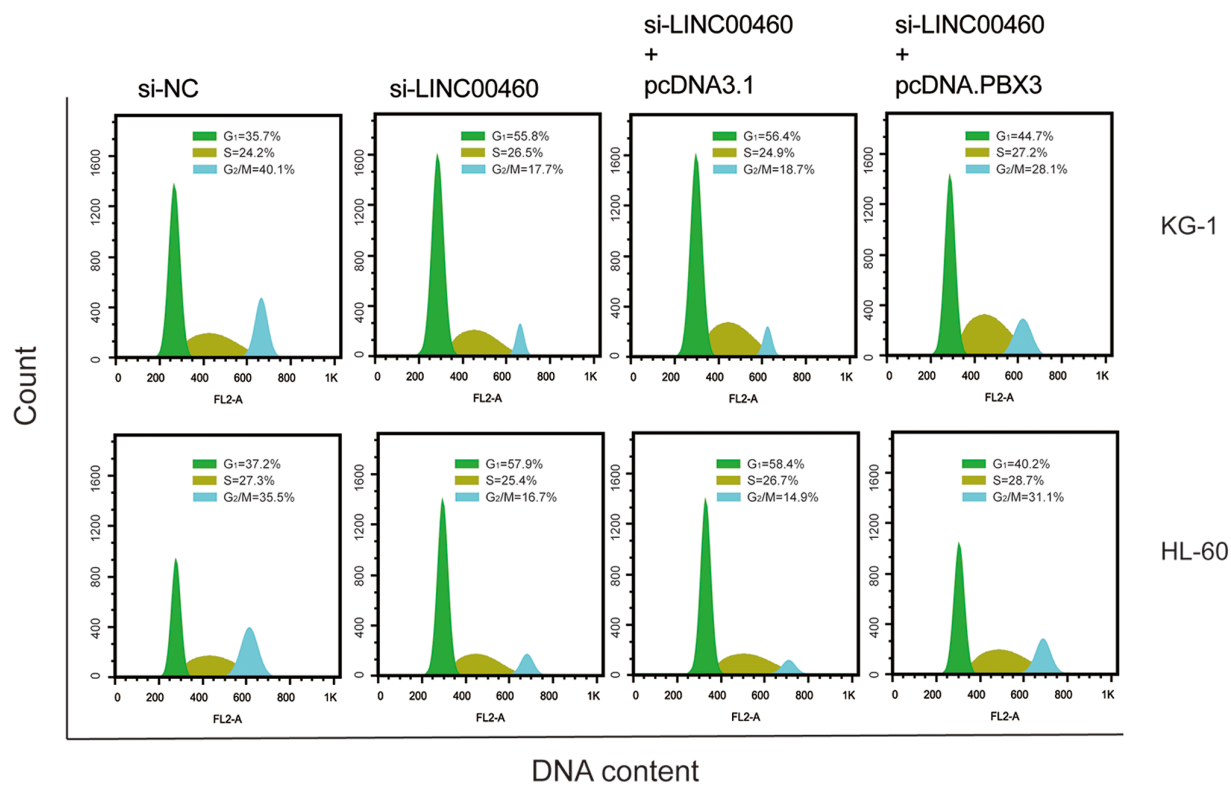

Supplement: Supplementary file 1 [file downloadSupplementary]
